# Supplementary material
Source: publisher figshare collection journal article supplement (https://frontiersin.figshare.com/ndownloader/files/21529458)
Supplement: Supplementary file [file 21529458]

Have you ever had any romantic relationships?

- ☐ Yes, currently (1)
- ☐ Yes, in the past but not currently (2)
- ☐ No (3)

How long have you had your current romantic relationship?

- ☐ Less than 1 month (1)
- ☐ 1-3 months (2)
- ☐ 3-6 months (3)
- ☐ 6 months-1 year (4)
- ☐ More than 1 year (5)

How many romantic relationships have you ever had?

- ☐ 1 (1)
- ☐ 2 (2)
- ☐ 3 (3)
- ☐ 4 (4)
- ☐ 5 (5)
- ☐ 6 (6)
- ☐ 7+ (7)

Do you consider yourself to be:

- ☐ Heterosexual or straight (1)
  - ☐ Gay or lesbian (2)
  - ☐ Bisexual (3)
  - ☐ Questioning or unsure (4)
  - ☐ An identify not listed: please specify (5)
- 

People are different in their sexual attraction to other people. Which best describes your feelings? Are you:

- ☐ Only attracted to females? (1)
- ☐ Mostly attracted to females? (2)
- ☐ Equally attracted to females and males? (3)
- ☐ Mostly attracted to males? (4)
- ☐ Only attracted to males? (5)
- ☐ Not sure? (6)

What gender do you consider yourself to be?

- ☐ Male (1)
  - ☐ Female (2)
  - ☐ Questioning or unsure (3)
  - ☐ Other identity not listed: please specify (4)
-
